# Supplementary material for: Spin selection in atomic-level chiral metal oxide for photocatalysis
Source: Springer Nature journal article supplement (doi:10.1038/s41467-023-40367-x), 2023-07-28
Supplement: MOESM1 [file 41467_2023_40367_MOESM1_ESM.pdf]

## **Supplementary Information (SI)**

### **Spin selection in atomic-level chiral metal oxide for photocatalysis**

Minhua Ai<sup>1,2</sup>, Lun Pan<sup>1,2,3\*</sup>, Chengxiang Shi<sup>1,2,3</sup>, Zhen-Feng Huang<sup>1,2,3</sup>, Xiangwen Zhang<sup>1,2,3</sup>, Wenbo Mi<sup>4</sup>, Ji-Jun Zou<sup>1,2,3\*</sup>

<sup>1</sup>Key Laboratory for Green Chemical Technology of the Ministry of Education, School of Chemical Engineering and Technology, Tianjin University, Tianjin 300072, China.

<sup>2</sup>Collaborative Innovative Center of Chemical Science and Engineering (Tianjin), Tianjin 300072, China.

<sup>3</sup>Haihe Laboratory of Sustainable Chemical Transformations, Tianjin, 300192, China.

<sup>4</sup>Tianjin Key Laboratory of Low Dimensional Materials Physics and Preparation Technology, School of Science, Tianjin University, Tianjin 300354, China.

\* E-mail: panlun76@tju.edu.cn (L. Pan); jj\_zou@tju.edu.cn (J.-J. Zou).

## 1. Supplementary Methods

**Materials:** L/D/DL-methionine were purchased from Meryer Chemical Technology Co., Ltd; zinc acetate and potassium permanganate ( $\text{KMnO}_4$ ) were from Tianjin Guangfu Fine Chemical Research Institute; *n*-butanol was from Tianjin Kemiou Chemical Reagent Co., Ltd; RhB was from Aladdin Industry Corporation. The ultrapure water with a resistivity higher than  $18.2 \text{ M}\Omega\cdot\text{cm}$  was used in all experiments.

**Substrate activation:** Fluorine-doped tin oxide (FTO) glass substrates were cleaned ultrasonically with acetone, ethanol and water in sequence. Then, the FTO glass was immersed in 20 mL of a 10 mM fresh  $\text{KMnO}_4$  aqueous solution with 50  $\mu\text{L}$  of *n*-butanol as the reducing agent and kept at  $85^\circ\text{C}$  for 20 min. After that, the activated substrates were rinsed with water and ethanol and dried at  $60^\circ\text{C}$ .

**General structure characterizations:** X-ray diffraction (XRD) characterization were recorded at a scanning rate of  $7^\circ/\text{min}$  under  $\text{Cu K}\alpha$  radiation at 40 kV and 40 mA (Bruker, D8-Focus). Scanning electron microscope (SEM) images were observed using a field-emission scanning electron microscope (Hitachi, Regulus 8100). Transmission electron microscopy (TEM) and elemental mapping were carried out using a field emission transmission electron microscope (JEOL, JEM-F 200 and 2100). X-ray photoelectron spectrum (XPS) analysis was conducted with a PHI-1600 XPS system equipped with  $\text{Al K}\alpha$  radiation, and the  $\text{C1s}$  peak (284.8 eV) was calibrated as contamination carbon. UV-vis diffuse reflectance spectra (UV-vis DRS) were obtained by using  $\text{BaSO}_4$  as reference (Shimadzu, UV-2600). Thermogravity (TG) analysis was conducted on a TGA Q500 thermogravimeter under an air atmosphere with a rate of  $5^\circ\text{Cmin}^{-1}$ . The specific rotation of chiral ZnO photoanodes were measured by a polarimeter (Germany, KRÜSS P8000) with the specific rotation of  $0.29^\circ$  and  $-0.84^\circ$  under the test wavelength of 589 nm.

## 2. Supplementary Figures

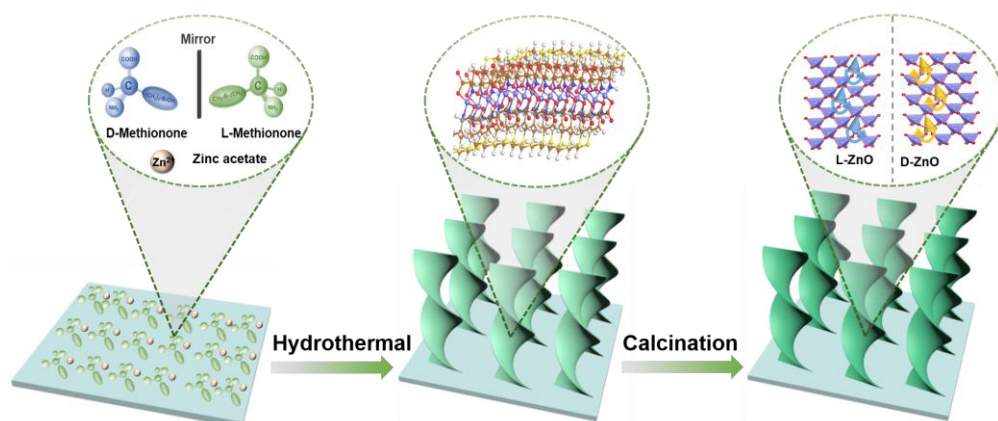

Figure S1. Schematic diagram of chiral film fabrication.

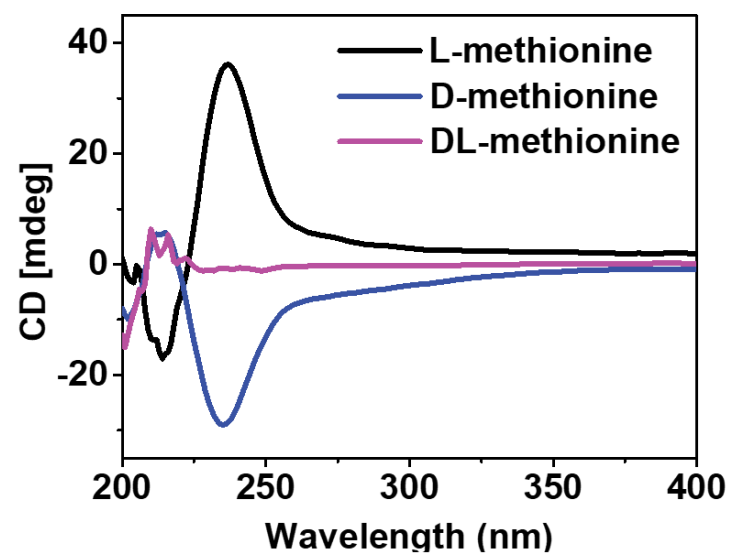

Figure S2. TCD spectra of solid L-, D- and DL-methionine.

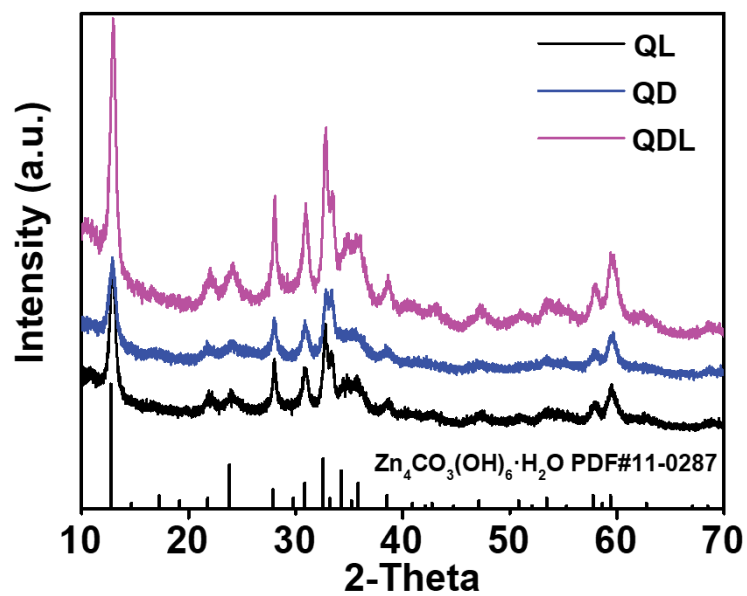

Figure S3. X-ray diffraction patterns of zinc carbonate hydroxide hydrate synthesized by hydrothermal processes. QL-ZnO, QD-ZnO and QDL-ZnO are the precursors of L-, D- and DL-ZnO, respectively.

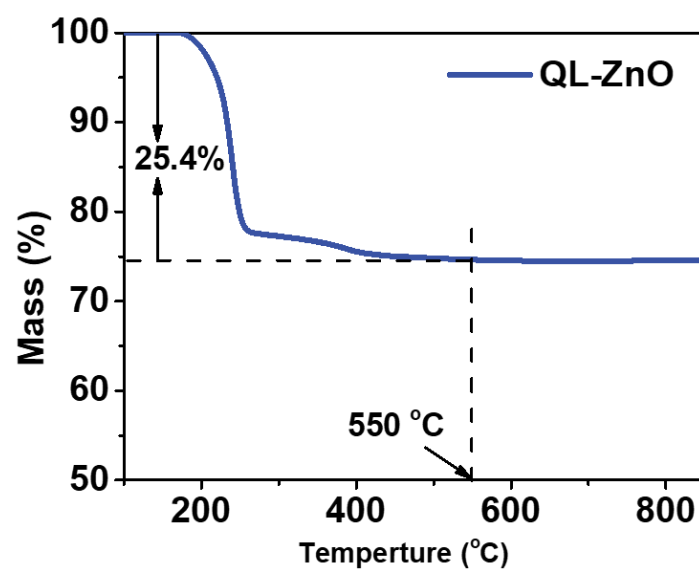

Figure S4. TG curves of QL-ZnO. QDL-ZnO is the precursor of DL-ZnO.

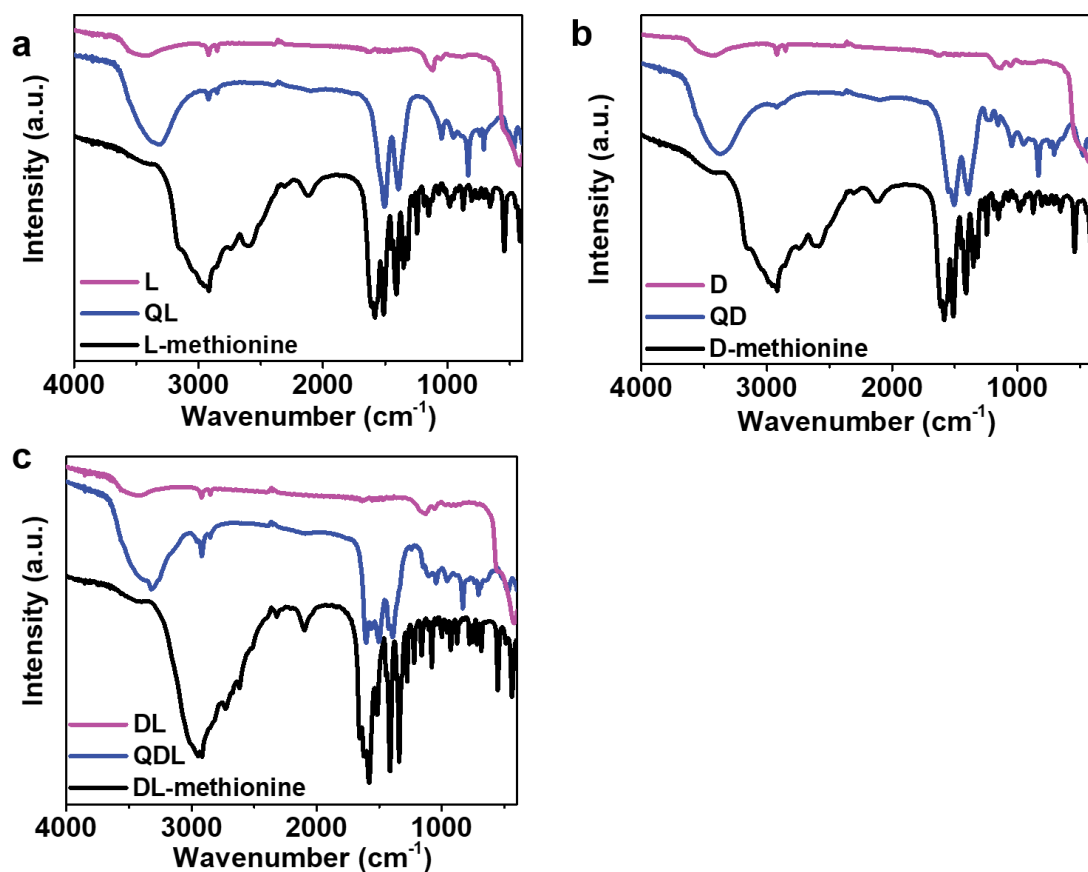

Figure S5. FTIR spectra of (a) L-methionine (black line), QL-ZnO (blue line) and L-ZnO (purple line); (b) D-methionine (black line), QD-ZnO (blue line) and D-ZnO (purple line); (c) DL-methionine (black line), QDL-ZnO (blue line) and DL-ZnO (purple line). QL-ZnO, QD-ZnO and QDL-ZnO is precursor of L-, D- and DL-ZnO, respectively.

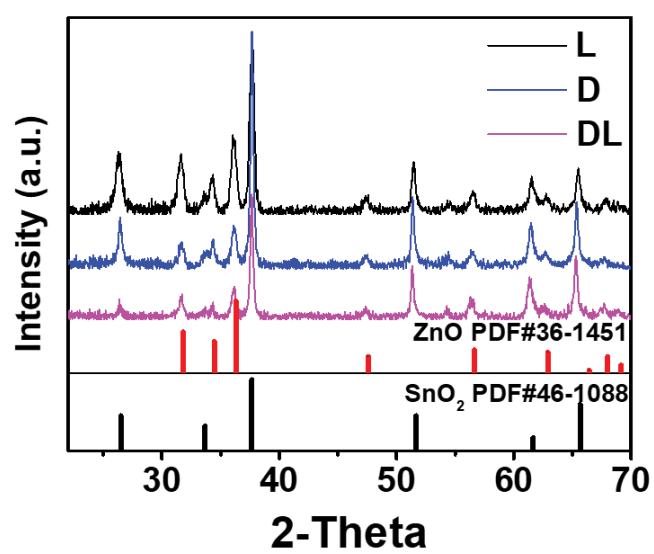

Figure S6. XRD patterns of L-ZnO, D-ZnO and DL-ZnO.



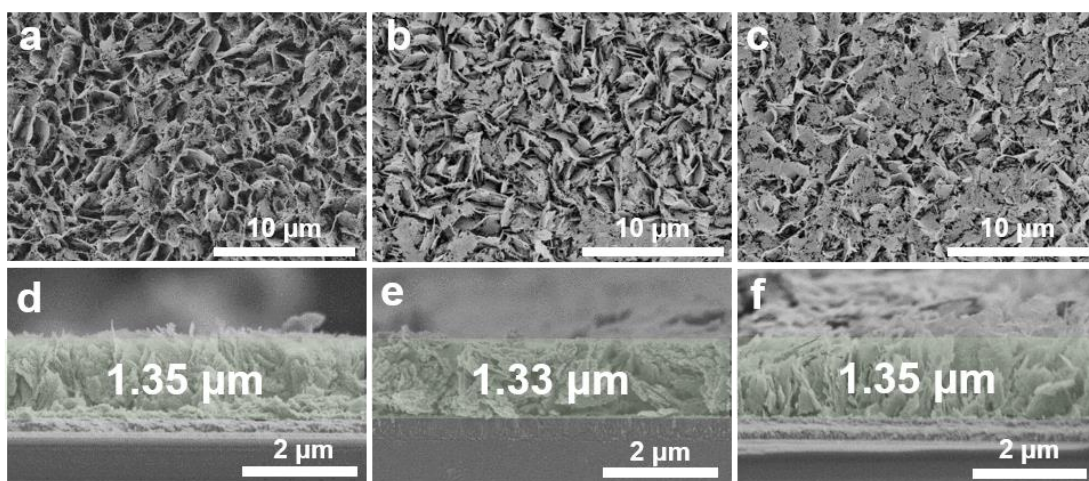

Figure S7. Top-view and cross-sectional SEM images of (a, d) L-ZnO, (b, e) D-ZnO and (c, f) DL-ZnO.

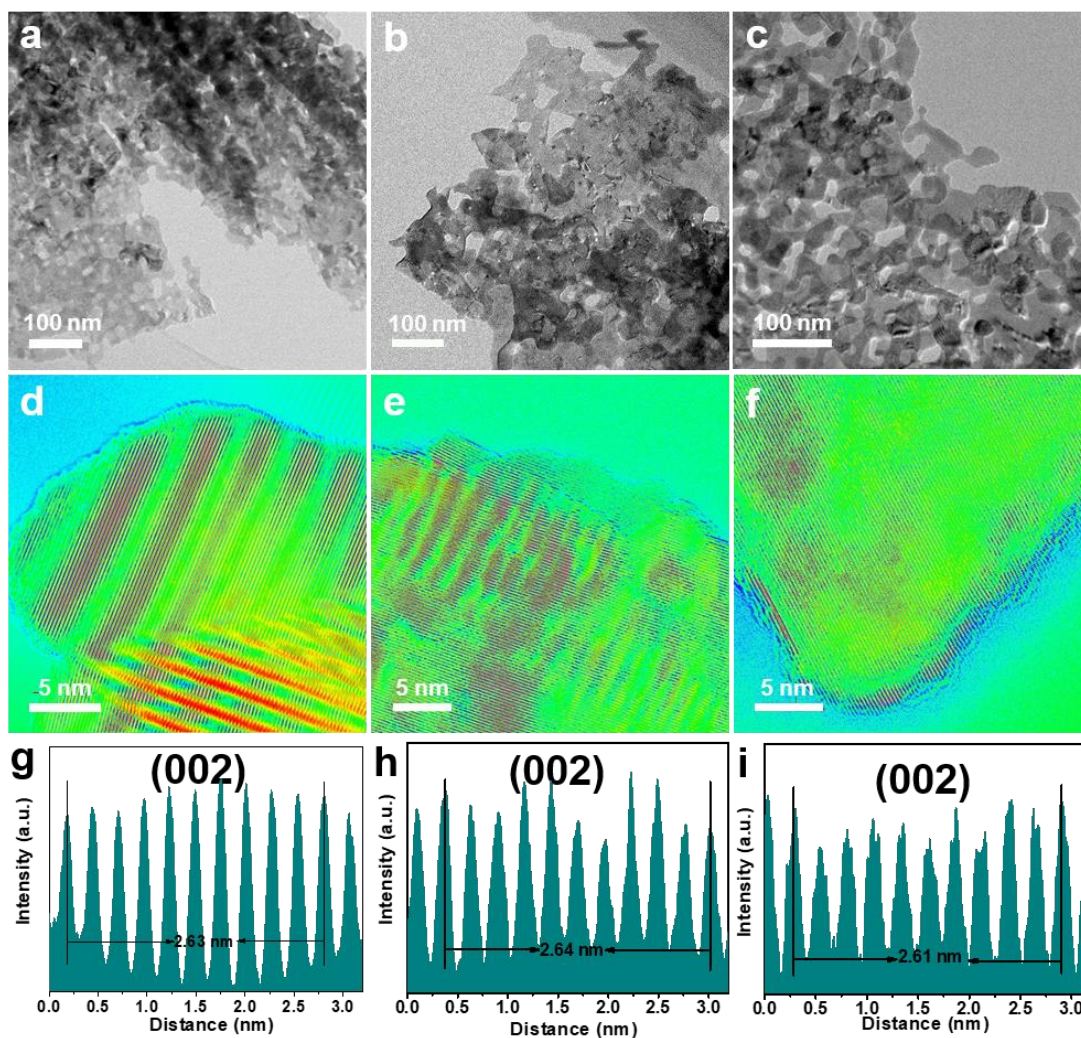

Figure S8. TEM images of (a) L-ZnO, (b) D-ZnO and (c) DL-ZnO. HRTEM images and the corresponding lattice fringe spacing of (d) and (g) L-ZnO, (e) and (h) D-ZnO, (f) and (i) DL-ZnO.

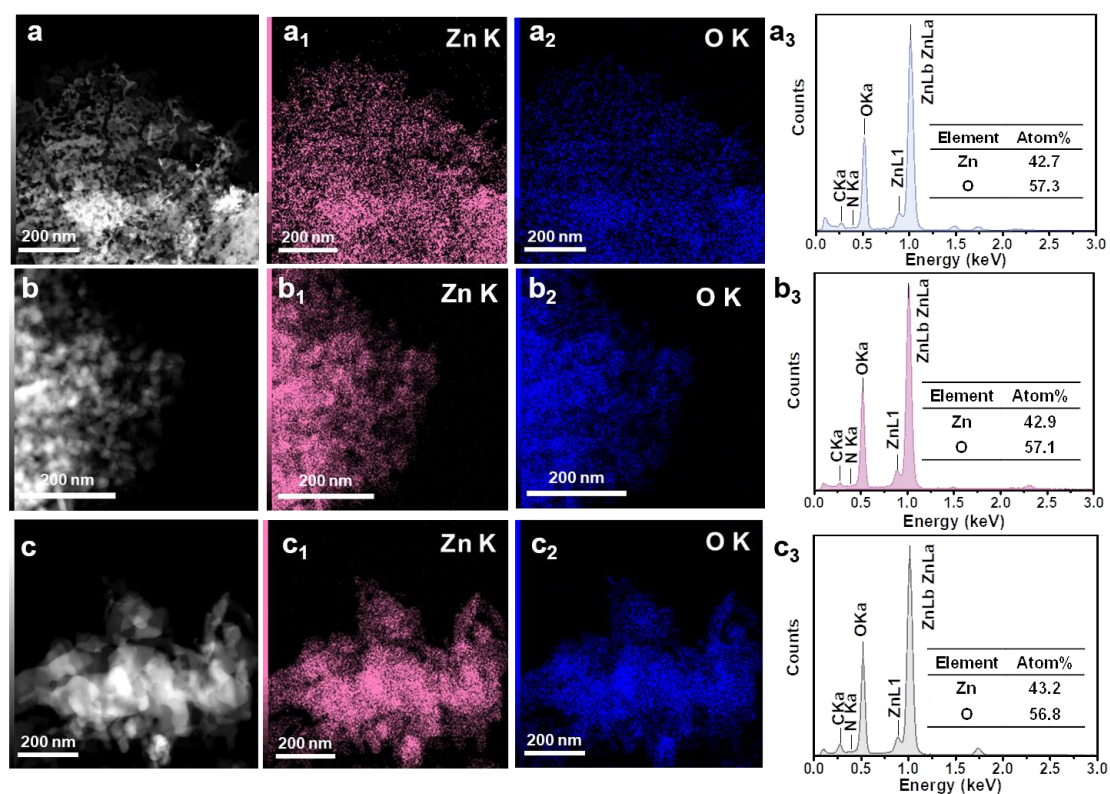

Figure S9. Energy-dispersive X-ray spectroscopy (EDS) of (a) L-ZnO, (b) D-ZnO and (c) DL-ZnO.

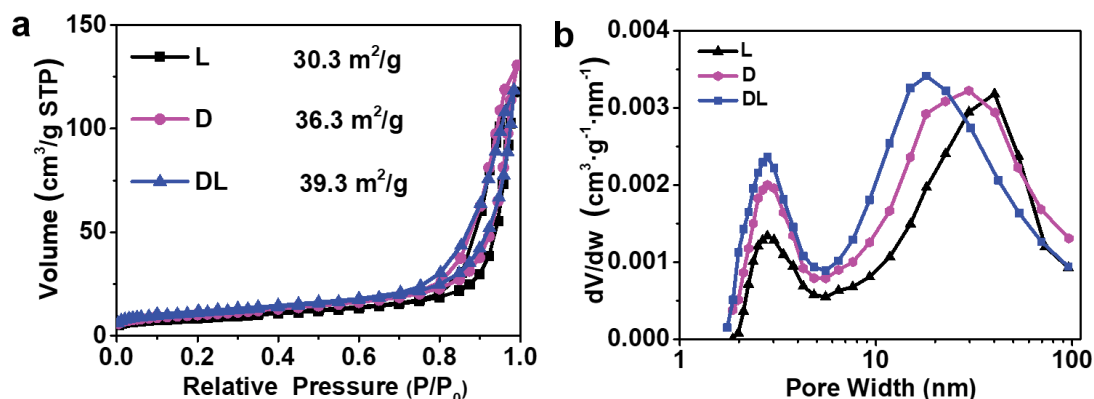

Figure S10. Specific surface area and pore structure. (a) N<sub>2</sub> adsorption-desorption isotherm curves and (b) Pore size distribution of L-ZnO, D-ZnO and DL-ZnO.

The surface area and porosity structure have important effects on the light absorption and activity of photocatalysts<sup>1-3</sup>, which were investigated by N<sub>2</sub> adsorption-desorption measurements (Figure S10, SI). All samples show typical IV isotherms with H<sub>3</sub>-type hysteresis loops, indicating the presence of mesopores. The BET surface area values of L-ZnO, D-ZnO and DL-ZnO are 30.3, 36.3 and 39.3 cm<sup>2</sup>/g, respectively. Moreover, L-ZnO, D-ZnO and DL-ZnO possess the similar mesopores with size of 2.8 nm, and they also have mesopores with size of 40.1, 29.8 and 18.3 nm, respectively. The total pore volumes of L-ZnO, D-ZnO and DL-ZnO are 0.18, 0.20, and 0.18 cm<sup>3</sup>/g, respectively. Although the presence of mesoporous structure is beneficial to enhance light scattering/reflection and provide active sites, the photocatalytic activity difference between the three samples due only to the surface area and porosity structure will be relatively small.

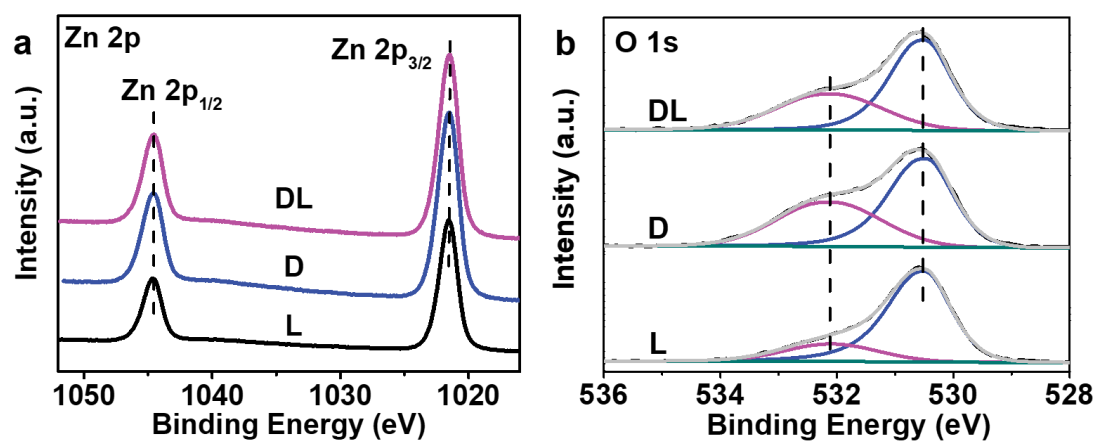

Figure S11. High-resolution XPS of (a) Zn 2p and (b) O1s of L-ZnO, D-ZnO and DL-ZnO.

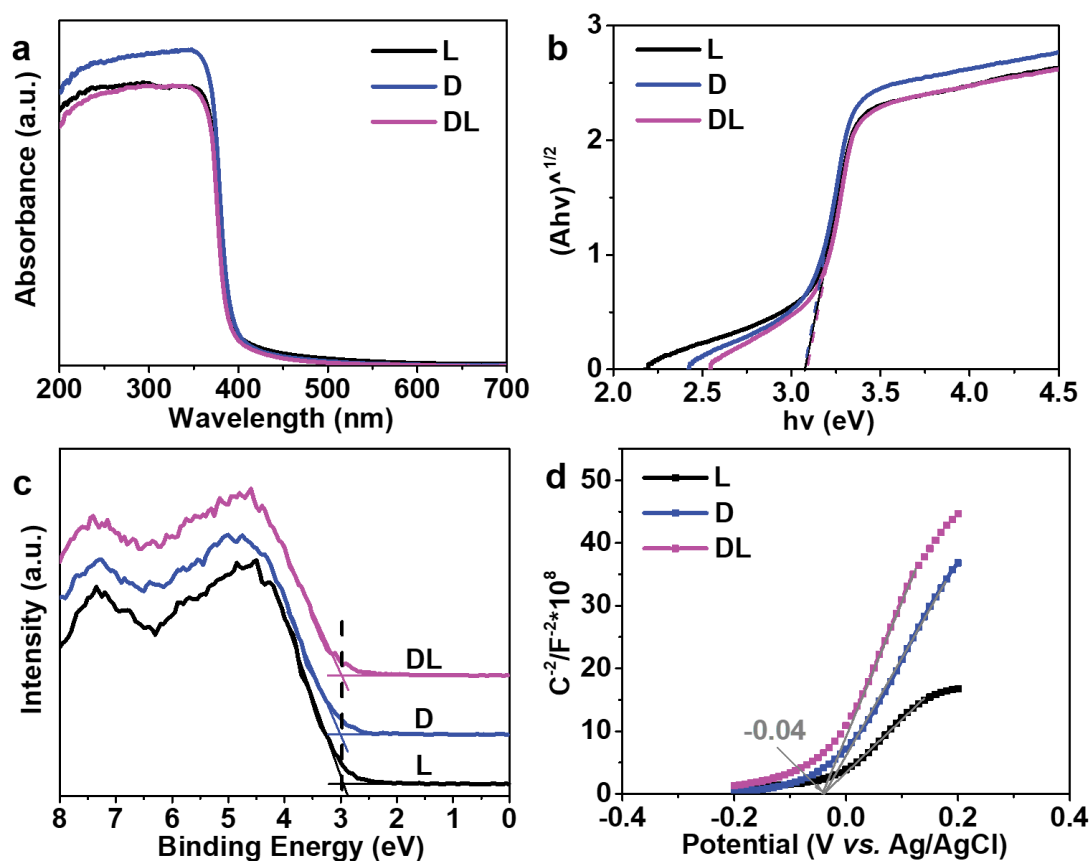

Figure S12. Optical properties and band structures. (a) UV-vis absorption spectra; (b) calculated band gap; (c) XPS valence band; (d) MS polts of L-ZnO, D-ZnO and DL-ZnO.



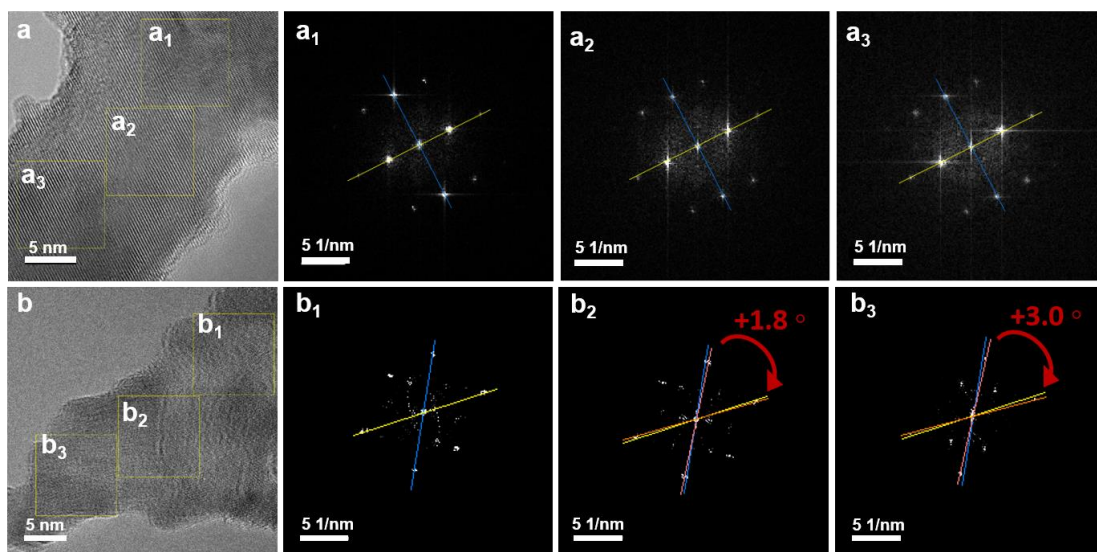

Figure S13. (a) HRTEM image and ( $a_1$ - $a_3$ ) the corresponding Fast Fourier transform images of DL-ZnO nanoplates. (b) HRTEM image and ( $b_1$ - $b_3$ ) the corresponding Fast Fourier transform images of D-ZnO.

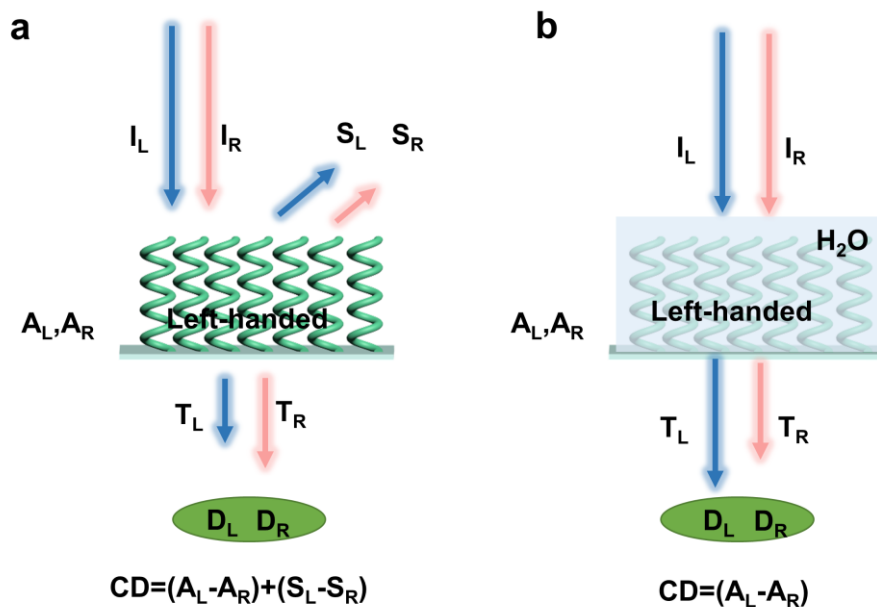

Figure S14. Schematic illustration of transmitted CD spectra of (a) the sample and (b) the sample infiltrated with water (isotropic liquid). Red and blue arrows represent to right- and left-handed polarized light, respectively. I is the incident light ( $I_L = I_R$ ), A is the absorbed light, T is the transmitted light, S is the scattered light, D is the detected light.<sup>4</sup> Copyright 2022 Wiley-VCH.



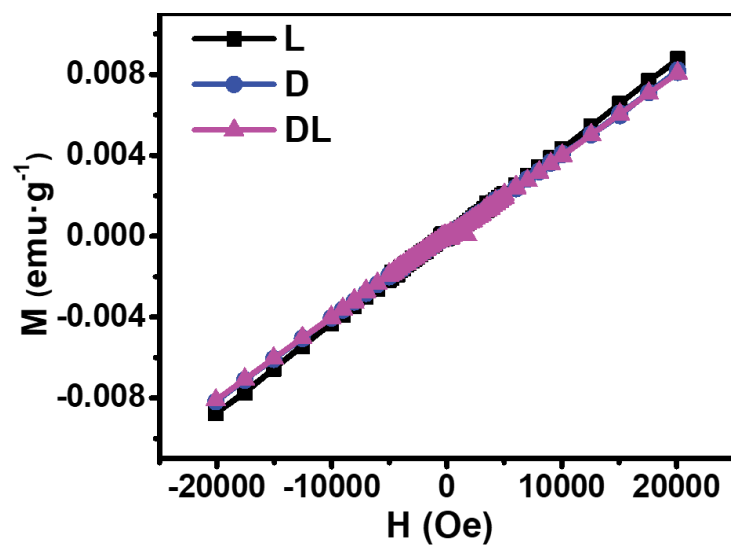

Figure S15. Magnetization loops of L-ZnO, D-ZnO and DL-ZnO.

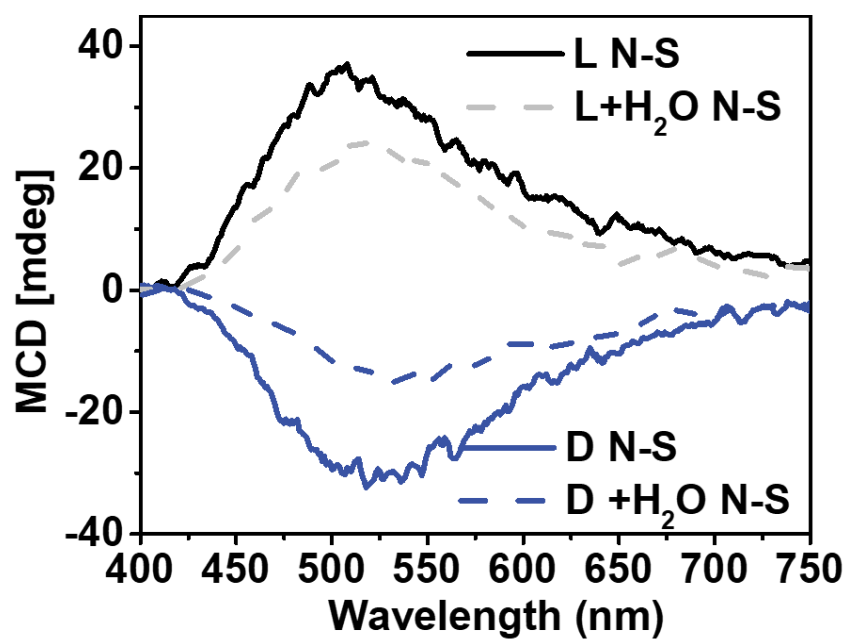

Figure S16. MCD spectra of dried films (solid lines) and films infiltrated with saturated water (dashed lines) under parallel applied magnetic fields of L-ZnO and D-ZnO.

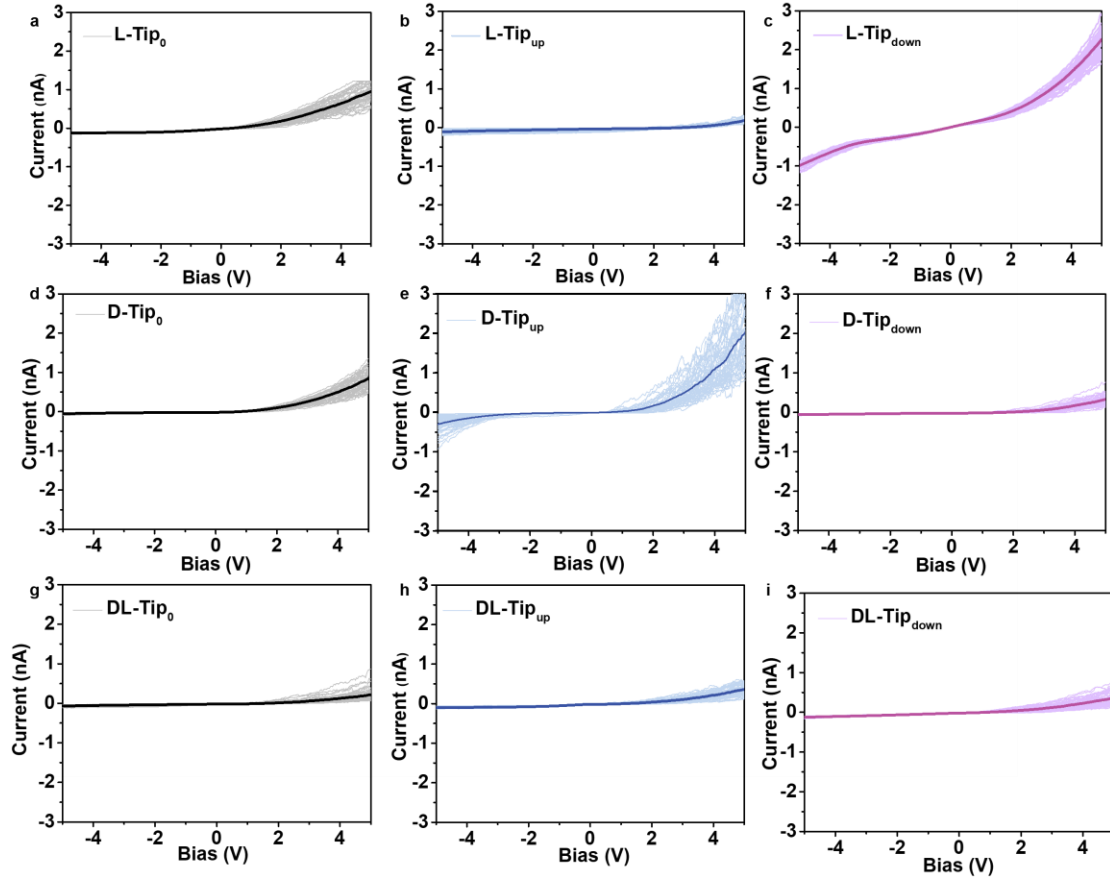

Figure S17. I-V curves obtained from L-ZnO, D-ZnO and DL-ZnO using mc-AFM. (a-c) The current as a function of the applied voltage I-V curves of L-ZnO with the tips magnetized in the nonmagnetized (black), up (blue) and down (purple). (d-f) The current as a function of the applied voltage I-V curves of D-ZnO with the tips magnetized in the nonmagnetized (black), up (blue) and down (purple). (g-i) The current as a function of the applied voltage I-V curves of DL-ZnO with the tips magnetized in the nonmagnetized (black), up (blue) and down (purple).

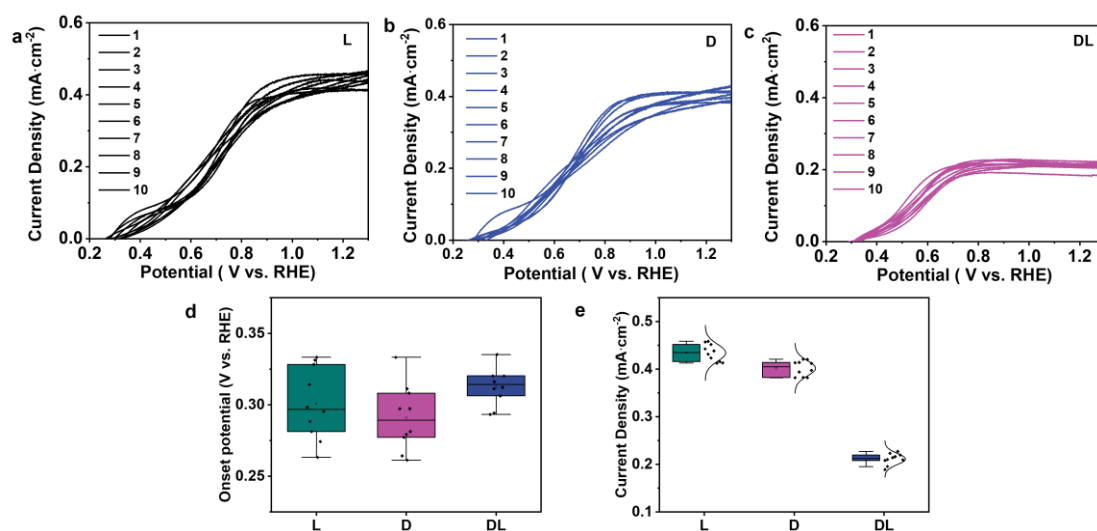

Figure S18. Reproducibility of PEC performance of (a) L-ZnO, (b) D-ZnO and (c) DL-ZnO. (d) Statistics of onset potential and (e) current density at 1.23 V vs. RHE of L-ZnO, D-ZnO and DL-ZnO.

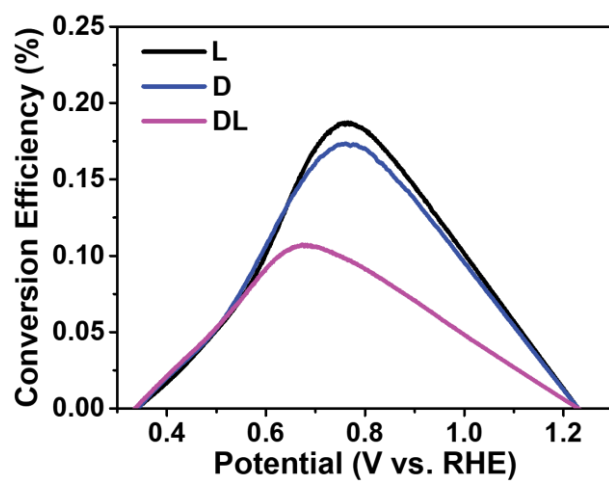

Figure S19. ABPE curves of L-ZnO, D-ZnO and DL-ZnO.

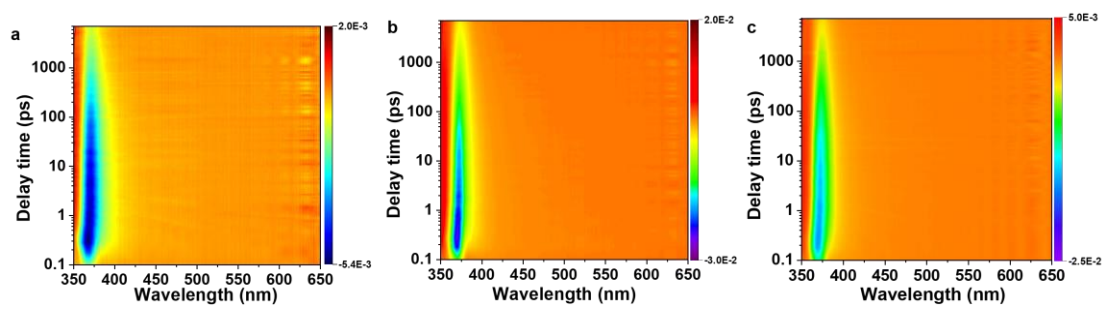

Figure S20. Pseudocolor transient absorption spectra of (a) L-ZnO, (b) D-ZnO and (c) DL-ZnO.

**Table S1.** Performance comparison of ZnO-based photoanodes in this work and previous literatures.

| Photoanode                                | Modification strategy              | Electrolyte                                                       | Photocurrent                                           | Reference |
|-------------------------------------------|------------------------------------|-------------------------------------------------------------------|--------------------------------------------------------|-----------|
| L-ZnO                                     | Chiral structure                   | 0.5 M Na <sub>2</sub> SO <sub>4</sub>                             | 0.43 mA/cm <sup>2</sup> at 1.23 V <sub>RHE</sub>       | This work |
| D-ZnO                                     |                                    |                                                                   | 0.40 mA/cm <sup>2</sup> at 1.23 V <sub>RHE</sub>       |           |
| ZnO (002)                                 | Facet engineering                  | 0.5 M Na <sub>2</sub> SO <sub>4</sub>                             | 0.35 ± 0.01 mA/cm <sup>2</sup> at 1.2 V <sub>RHE</sub> | 5         |
| ZnO/g-C <sub>x</sub> N <sub>y</sub> (1.0) | Conformal coating                  | 0.1 M KOH                                                         | ~0.25 mA/cm <sup>2</sup> at 1.23 V <sub>RHE</sub>      | 6         |
| ZnO:Co@ZIF-8                              | Doping and functionalization       | pH=13 alkaline solution                                           | <0.16 mA/cm <sup>2</sup> at 1.33 V <sub>RHE</sub>      | 7         |
| 15 nm SnS <sub>2</sub> /b-ZnO NW          | Heterojunction                     | 0.35 M Na <sub>2</sub> SO <sub>3</sub> + 0.25 M Na <sub>2</sub> S | 0.36 mA/cm <sup>2</sup> at 1.23 V <sub>RHE</sub>       | 8         |
| In doped ZnO                              | Element doping                     | 0.1 M Na <sub>2</sub> SO <sub>4</sub>                             | 0.42 mA/cm <sup>2</sup> at 1.23 V <sub>RHE</sub>       | 9         |
| Al doped ZnO                              | Element doping                     | 0.5 M Na <sub>2</sub> SO <sub>4</sub>                             | 0.31 mA/cm <sup>2</sup> at 1.23 V <sub>RHE</sub>       | 10        |
| C-ZnO NRs                                 | Element doping                     | 0.5 M Na <sub>2</sub> SO <sub>4</sub>                             | 14.8 µA/cm <sup>2</sup> at 0.9 V <sub>RHE</sub>        | 11        |
| N-ZnO                                     |                                    |                                                                   | 13 µA/cm <sup>2</sup> at 0.9 V <sub>RHE</sub>          |           |
| S-ZnO                                     |                                    |                                                                   | 6 µA/cm <sup>2</sup> at 0.9 V <sub>RHE</sub>           |           |
| ZnO/ZnS                                   | Heterostructure                    | 0.5 M Na <sub>2</sub> SO <sub>3</sub>                             | 0.073 mA/cm <sup>2</sup> at 0.78 V <sub>RHE</sub>      | 12        |
| ZnO@ZIF-8/67                              | Ternary hierarchical semiconductor | 0.5 M Na <sub>2</sub> SO <sub>4</sub>                             | 0.11 mA/cm <sup>2</sup> at 1.23 V <sub>RHE</sub>       | 13        |
| ZnO QDs/NRs                               | Homojunction                       | 0.5 M Na <sub>2</sub> SO <sub>4</sub>                             | 0.42 mA/cm <sup>2</sup> at 1.23 V <sub>RHE</sub>       | 14        |
| ZnO@N-CD@ZIF-8                            | Photosensitization                 | 0.5 M Na <sub>2</sub> SO <sub>4</sub>                             | ~0.30 mA/cm <sup>2</sup> at 0.73 V <sub>RHE</sub>      | 15        |

**Table S2.** Fitted lifetimes and their percentages of L-ZnO, D-ZnO and DL-ZnO.

| Samples | Decay life times (ps) |                  |                  | Fractional contribution (%) |       |       | Average carrier lifetimes (ps) |
|---------|-----------------------|------------------|------------------|-----------------------------|-------|-------|--------------------------------|
|         | $\tau_1$              | $\tau_2$         | $\tau_3$         | $f_1$                       | $f_2$ | $f_3$ |                                |
| L-ZnO   | 22.7 $\pm$ 6.3        | 335.4 $\pm$ 70.3 | 10060 $\pm$ 1870 | 20.7                        | 38.7  | 40.6  | 4218.9                         |
| D-ZnO   | 1.4 $\pm$ 0.4         | 126.0 $\pm$ 27.5 | 5720 $\pm$ 899   | 31.4                        | 31.3  | 37.3  | 2173.5                         |
| DL-ZnO  | 0.53 $\pm$ 0.3        | 113.0 $\pm$ 24.8 | 5519 $\pm$ 1140  | 35.8                        | 32.9  | 31.3  | 1764.8                         |



## Supplementary References

1. Wang, D. *et al.* Low-cost synthesis of a nanocomposite of MoS<sub>2</sub> and alkali-activated halloysite nanotubes for photocatalytic RhB degradation. *CrystEngComm* **24**, 6498-6504 (2022).
2. Liu, Y. *et al.* Synergistic effects of g-C<sub>3</sub>N<sub>4</sub> three-dimensional inverse opals and Ag modification toward high-efficiency photocatalytic H<sub>2</sub> evolution. *J. Clean. Prod.* **328**, 129745 (2021).
3. Hao, M. *et al.* Higher photocatalytic removal of organic pollutants using pangolin-like composites made of 3–4 atomic layers of MoS<sub>2</sub> nanosheets deposited on tourmaline. *Environ. Chem. Lett.* **19**, 3573-3582 (2021).
4. Bai, T. *et al.* Spin Selectivity of Chiral Mesostructured Iron Oxides with Different Magnetisms. *Small*, 2104509 (2022).
5. Pawar, A. U. *et al.* Crystal facet engineering of ZnO photoanode for the higher water splitting efficiency with proton transferable nafion film. *Nano Energy* **20**, 156-167 (2016).
6. Hajduk, Š. *et al.* Conformal carbon nitride coating as an efficient hole extraction layer for ZnO nanowires-based photoelectrochemical cells. *Adv. Mater. Interfaces* **4**, 1700924 (2017).
7. Galan-Gonzalez, A. *et al.* Cobalt-doped ZnO nanorods coated with nanoscale metal-organic framework shells for water-splitting photoanodes. *ACS Appl. Nano Mater.* **3**, 7781-7788 (2020).
8. Bagal, I. V. *et al.* Investigation of charge carrier dynamics in beaded ZnO nanowire decorated with SnS<sub>2</sub>/IrO<sub>x</sub> cocatalysts for enhanced photoelectrochemical water splitting. *Appl. Surf. Sci.* **613**, 156091 (2023).
9. Le, N. *et al.* Enhanced light absorption and charge separation of In-doped ZnO nanorod arrays for photoelectrochemical water-splitting application. *Int. J. Energ. Res.* **46**, 6264-6276 (2021).
10. Kant, R. *et al.* Fabrication of ZnO nanostructures using Al doped ZnO (AZO) templates for application in photoelectrochemical water splitting. *Appl. Surf. Sci.* **447**, 200-212 (2018).
11. Karmakar, K. *et al.* Stable and enhanced visible-light water electrolysis using C, N, and S surface functionalized ZnO nanorod photoanodes: engineering the absorption and electronic structure. *ACS Sustainable Chem. Eng.* **4**, 5693-5702 (2016).
12. Li, C. *et al.* ZnO/ZnS heterostructures grown on Zn foil substrate by hydrothermal method for photoelectrochemical water splitting. *Int. J. Hydrogen Energy* **44**, 25416-25427 (2019).
13. Jia, G. *et al.* 1D alignment of ZnO@ZIF-8/67 nanorod arrays for visible-light-driven photoelectrochemical water splitting. *Appl. Surf. Sci.* **448**, 254-260 (2018).
14. Chen, Y.-C. *et al.* Overall photoelectrochemical water splitting at low applied potential over ZnO quantum dots/nanorods homojunction. *Chem. Eng. J.* **368**, 746-753 (2019).
15. Han, H. *et al.* Highly ordered N-doped carbon dots photosensitizer on metal-organic framework-decorated ZnO nanotubes for improved photoelectrochemical water splitting. *Small* **15**, 1902771 (2019).
